# Supplementary material for: TDP-43 Depletion in Microglia Promotes Amyloid Clearance but Also Induces Synapse Loss
Source: PubMed Central journal article supplement — Neuron. 2017 Jul 19;95(2):297–308.e6. doi: 10.1016/j.neuron.2017.05.037 (PMC5519492; doi:10.1016/j.neuron.2017.05.037), 2017-07-19
Supplement: mmc1.pdf [file mmc1.pdf]

**Neuron, Volume 95**

**Supplemental Information**

**TDP-43 Depletion in Microglia Promotes**

**Amyloid Clearance but Also Induces Synapse Loss**

**Rosa C. Paolicelli, Ali Jawaid, Christopher M. Henstridge, Andrea Valeri, Mario Merlini, John L. Robinson, Edward B. Lee, Jamie Rose, Stanley Appel, Virginia M.-Y. Lee, John Q. Trojanowski, Tara Spires-Jones, Paul E. Schulz, and Lawrence Rajendran**

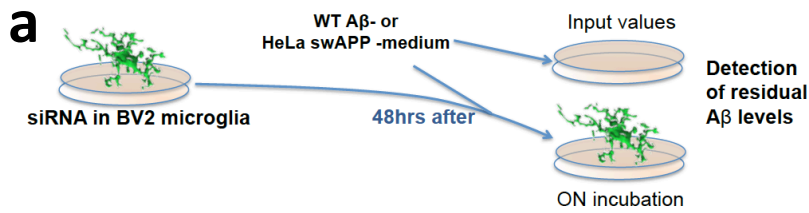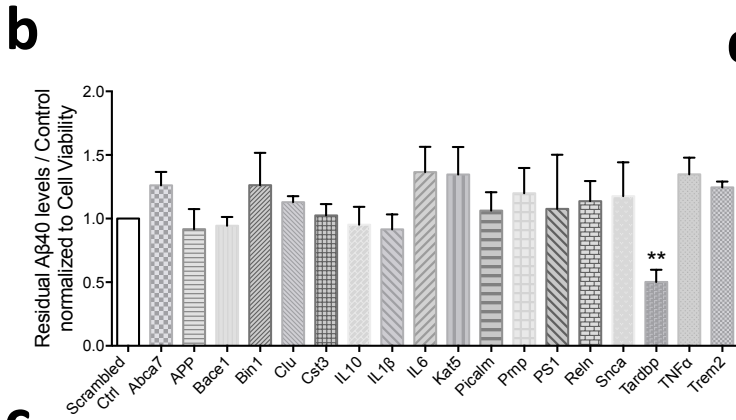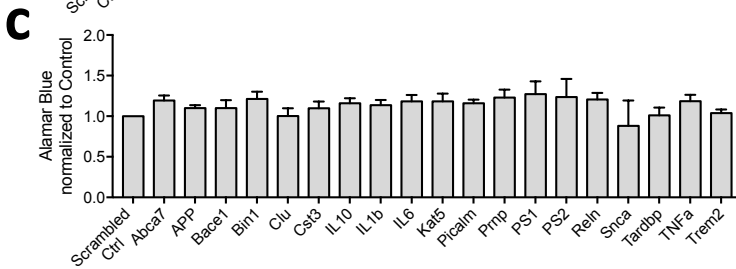

**d**

| Uncorrected Fisher's LSD        | Mean Diff. | 95.00% CI of diff. | Significant? | Summary | Individual P Value |
|---------------------------------|------------|--------------------|--------------|---------|--------------------|
| Scrambled Ctrl vs. Abca7        | -0.2612    | -0.631 to 0.1085   | No           | ns      | 0.1632             |
| Scrambled Ctrl vs. APP          | 0.0827     | -0.3701 to 0.5355  | No           | ns      | 0.7168             |
| Scrambled Ctrl vs. Bace1        | 0.05565    | -0.4672 to 0.5785  | No           | ns      | 0.8325             |
| Scrambled Ctrl vs. Bin1         | -0.2632    | -0.6766 to 0.1502  | No           | ns      | 0.2083             |
| Scrambled Ctrl vs. Clu          | -0.1291    | -0.4988 to 0.2406  | No           | ns      | 0.4885             |
| Scrambled Ctrl vs. Cst3         | -0.02469   | -0.3944 to 0.345   | No           | ns      | 0.8944             |
| Scrambled Ctrl vs. IL10         | 0.04823    | -0.3395 to 0.436   | No           | ns      | 0.8048             |
| Scrambled Ctrl vs. IL1 $\beta$  | 0.08454    | -0.2852 to 0.4543  | No           | ns      | 0.6498             |
| Scrambled Ctrl vs. IL6          | -0.366     | -0.7794 to 0.04736 | No           | ns      | 0.0818             |
| Scrambled Ctrl vs. Kats5        | -0.3468    | -0.7346 to 0.04098 | No           | ns      | 0.0788             |
| Scrambled Ctrl vs. Picalm       | -0.06281   | -0.4325 to 0.3069  | No           | ns      | 0.7358             |
| Scrambled Ctrl vs. Pmp          | -0.1992    | -0.5689 to 0.1705  | No           | ns      | 0.2862             |
| Scrambled Ctrl vs. PS1          | -0.07573   | -0.5986 to 0.4471  | No           | ns      | 0.7735             |
| Scrambled Ctrl vs. Reln         | -0.1371    | -0.5504 to 0.2763  | No           | ns      | 0.5106             |
| Scrambled Ctrl vs. Snca         | -0.1762    | -0.6991 to 0.3466  | No           | ns      | 0.5037             |
| Scrambled Ctrl vs. Tardbp       | 0.4993     | 0.1295 to 0.869    | Yes          | **      | 0.0088             |
| Scrambled Ctrl vs. TNF $\alpha$ | -0.348     | -0.7177 to 0.02174 | No           | ns      | 0.0647             |
| Scrambled Ctrl vs. Trem2        | -0.2454    | -0.6588 to 0.1679  | No           | ns      | 0.2404             |

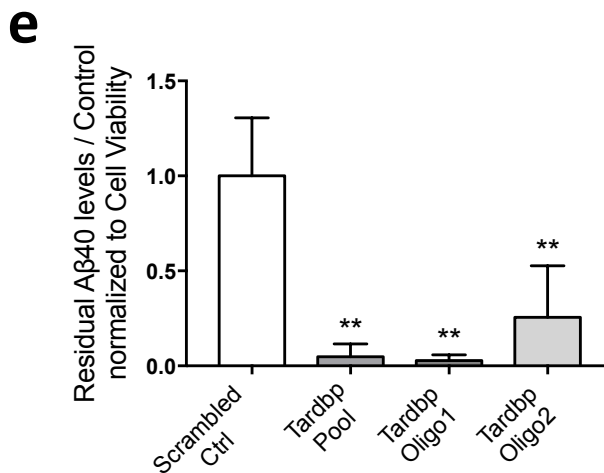

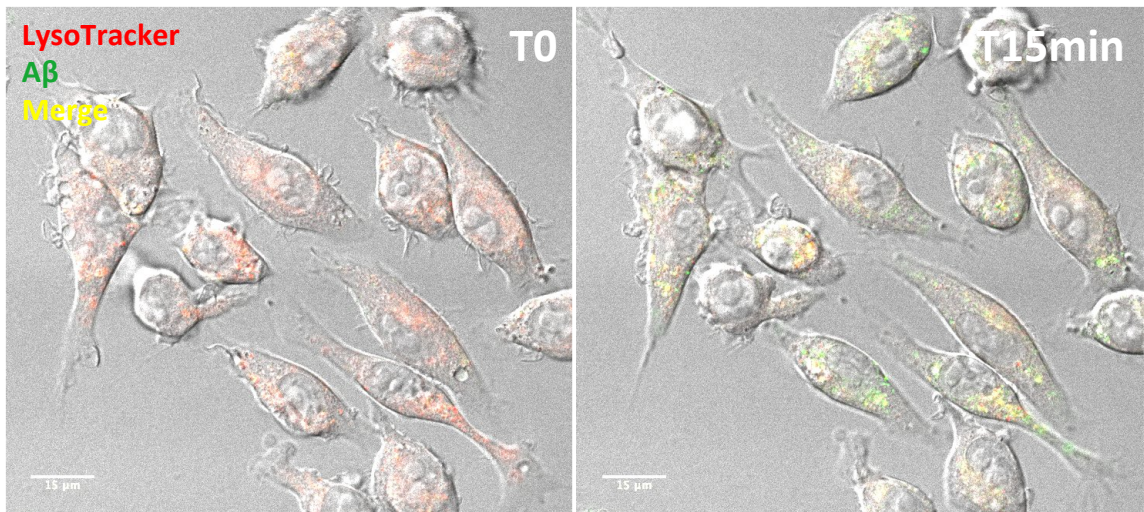

**Supplementary Figure 2**

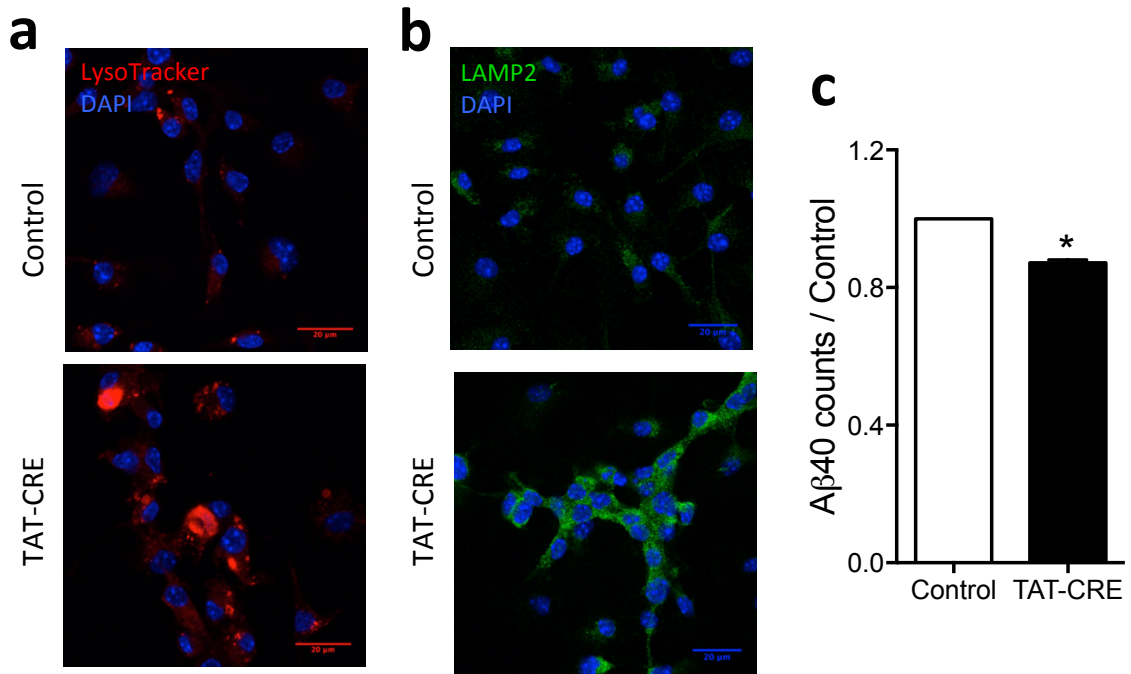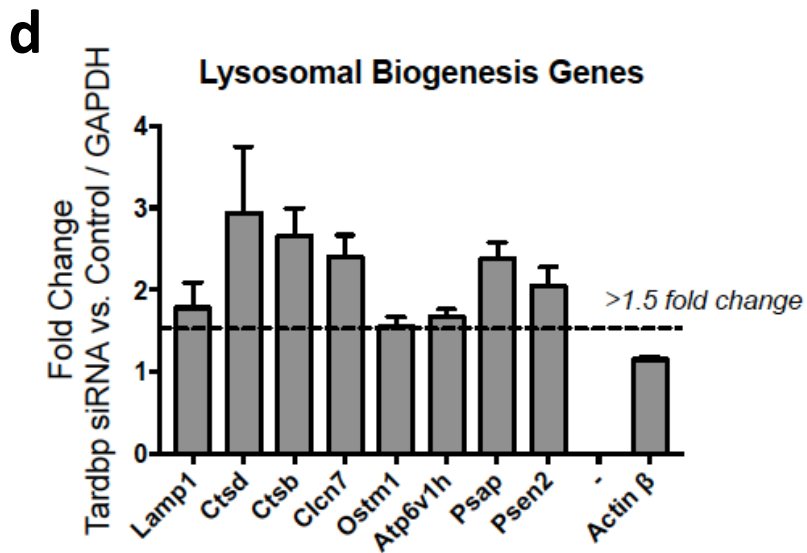

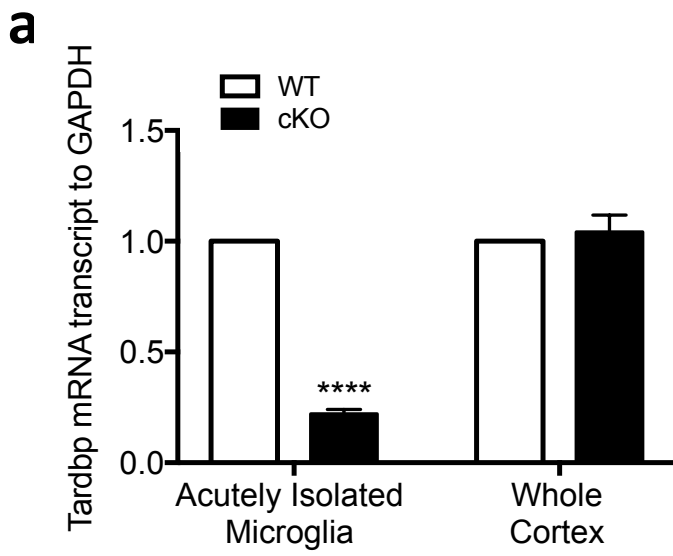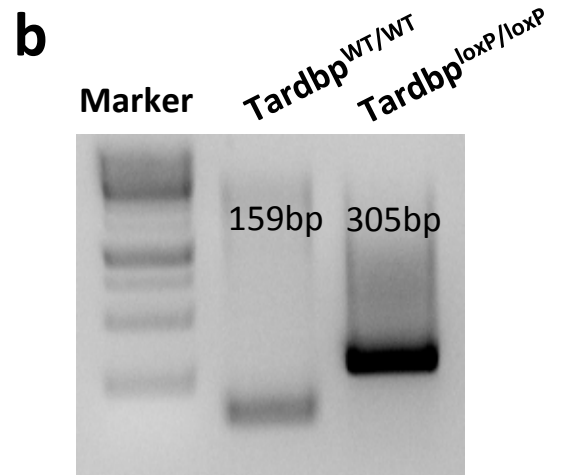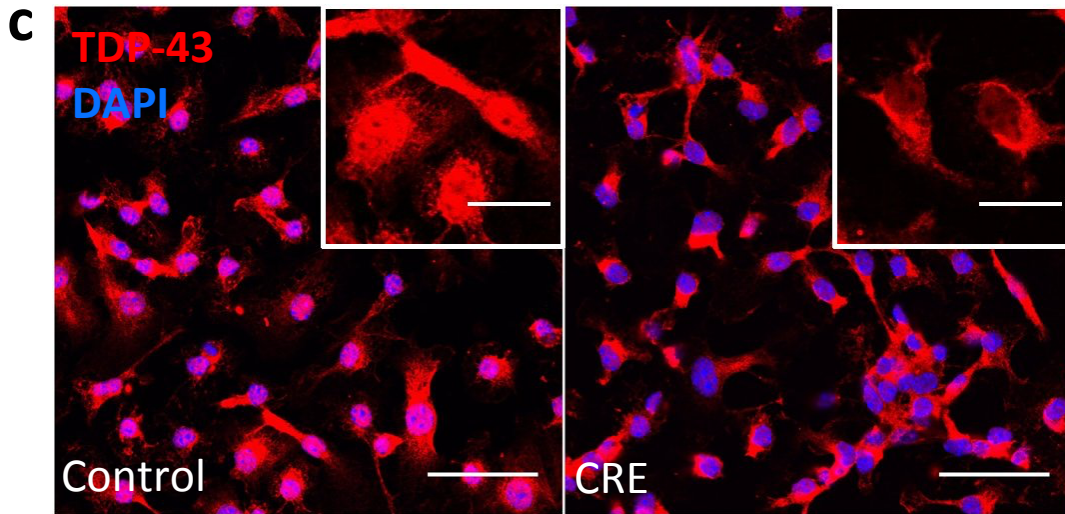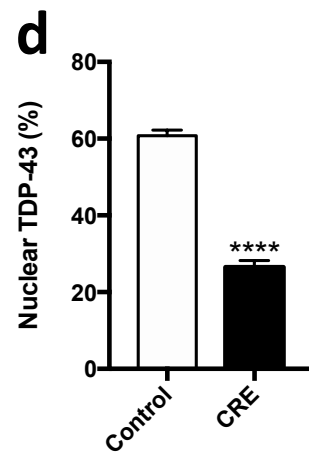

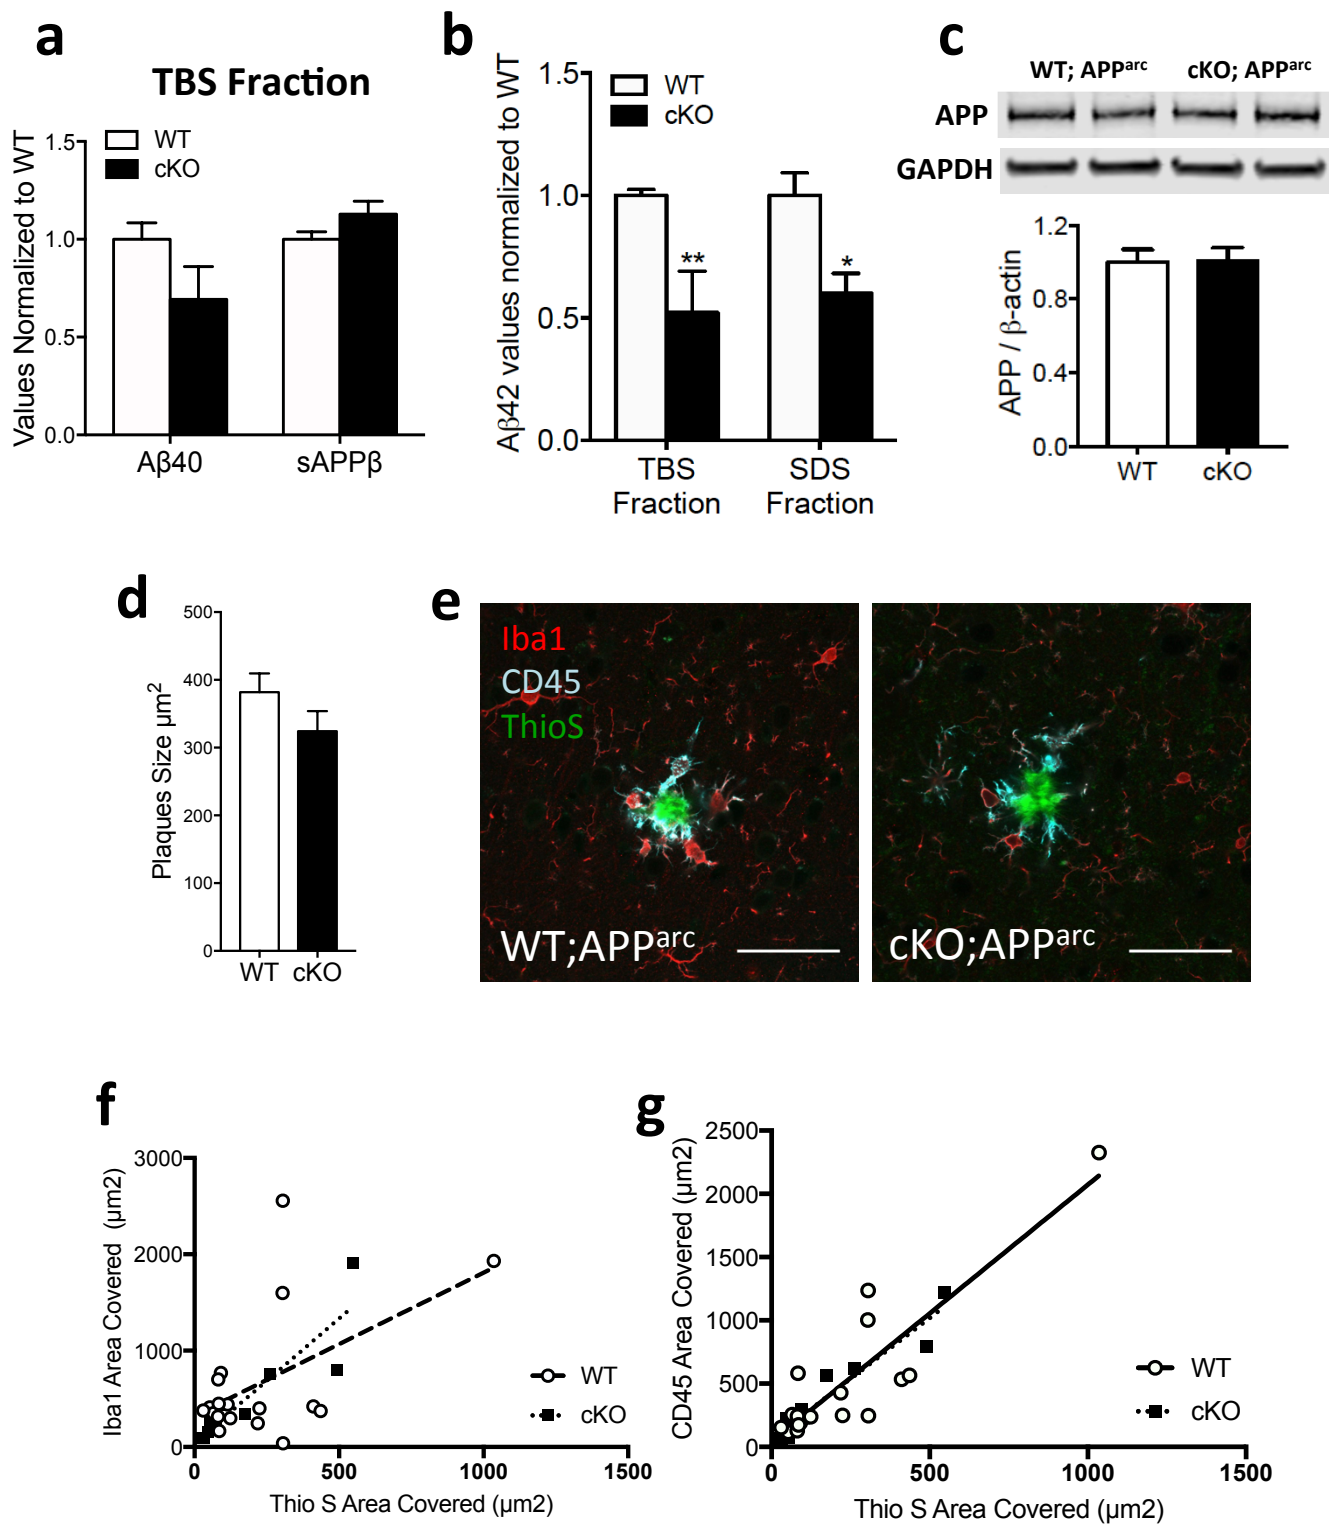

**Supplementary Figure 5**

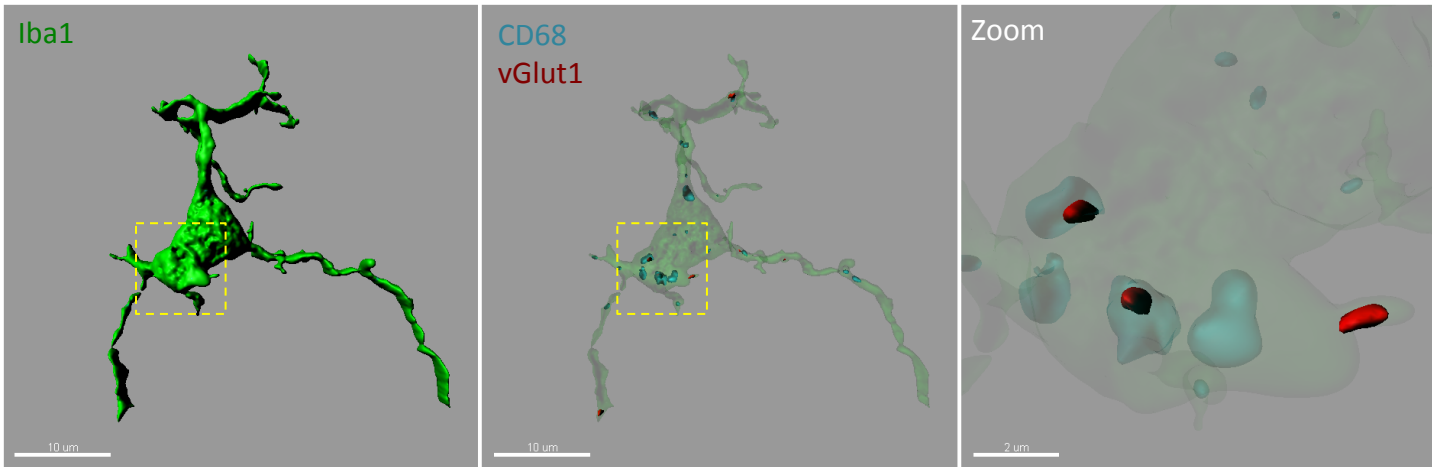

**Supplementary Figure 6**

## Supplementary Figures Legends

### **Figure S1, related to Figure 1. Screen and identification of Tardbp**

**a**, A $\beta$  clearance assay in BV2 cells: the clearance capacity of microglia was measured by their capability to clear murine A $\beta$  upon overnight incubation with WT primary neurons-conditioned medium. **b**, Knockdown screen for 18 genes associated with neurodegenerative disorders, assessed in A $\beta$  clearance assay: residual murine WT A $\beta$  levels were significantly reduced in Tardbp depleted cells compared to scrambled control (n=3-6, mean $\pm$ sem \*\* p<0.01, one-way ANOVA, Uncorrected Fisher's LSD Test). **c**, cell viability assay ensuring no toxic effects due to genes knockdown. **d**, table reporting the p value for each comparison vs. control (n=3-6, mean $\pm$ sem \*\* p<0.01, one-way ANOVA, Uncorrected Fisher's LSD Test). **e**, Residual A $\beta$ 40 levels from HeLa swAPP conditioned medium, after overnight incubation with BV2 cells depleted of TDP-43, normalized to scrambled control and to cell viability (means $\pm$ SEM, \*\* p<0.005, using one-way ANOVA followed by Dunnett's multiple comparison test).

### **Figure S2, related to Figure 1. Internalized A $\beta$ colocalize with acidic vesicles**

**a**, Representative confocal image of BV2 cells at T0 and after 15min incubation with pH sensitive dye LysoTracker (red) and fluorescently-labeled A $\beta$ 40 (green). Co-localization of the signals upon internalization is shown in yellow.



**Figure S3, related to Figure 1. TDP-43 depletion promotes lysosomal biogenesis**

**a**, Representative single focal plane micrographs for LysoTracker staining and **b**, immunohistochemistry against LAMP2 in *Tardbp*<sup>flxed/flxed</sup> primary microglia treated with control glycerol solution or recombinant CRE enzyme.

**c**, Quantification of A $\beta$  clearance assay in control- or CRE-treated *Tardbp*<sup>flxed/flxed</sup> primary microglia, showing significant reduction in residual A $\beta$ <sub>40</sub>Swe levels normalized to control (mean $\pm$ SEM, n=2; \*p<0.05, using two-tailed unpaired t-test). **d**, Fold-change expression of TFEB-regulated genes in BV2 cells depleted of TDP-43, as compared to scrambled control, normalized to GAPDH reference gene (>1.5 fold change cutoff, mean $\pm$ SEM, n=2)

**Figure S4, related to Figure 2. Validation of microglial TDP-43 depletion in**

***Tardbp* floxed mice**

**a**, RT-PCR detection of *Tardbp* mRNA transcripts normalized to *Gapdh* reference gene in an acutely isolated microglia population (pool of 4 brains per experiment, n=2) or in whole cortex from WT (n=3) or cKO (n=3) mice. \*\*\*\*p<0.0001 by two-way ANOVA, followed by uncorrected Fisher's LSD test. **b**, PCR from genomic DNA extracted by acutely isolated microglia confirming the presence of floxed *Tardbp* sequence in cKO samples compared to WT. **c**, Representative single focal plane micrographs for TDP-43 immunopositive signal, in control- or CRE-treated *Tardbp*<sup>flxed/flxed</sup> primary microglia. Scale bar, 40 $\mu$ m. Inset, scale bar, 15 $\mu$ m. **d**, Quantification of nuclear TDP-43 signal, shown as percentage of the nuclear area, in control- (n=200) or CRE-treated (n=173) *Tardbp*<sup>flxed/flxed</sup> primary microglia (mean $\pm$ SEM, n=3 per treatment, \*\*\*\*p<0.0001, using two-tailed unpaired t-test).

**Figure S5, related to Figure 3. Reduced amyloid levels in cKO mice**

Multiplexed electrochemoluminescent ELISA measurement of **a**, A $\beta$ 40 and sAPP $\beta$  levels in the TBS-fraction from App<sup>arc</sup>;WT and cKO cortex homogenates (mean $\pm$ SEM, n=4 mice per genotype) and **b**, A $\beta$ 42 levels in the TBS- and SDS-fraction of the same samples (mean $\pm$ SEM, \*\*p<0.01, \*p<0.05, by two-way ANOVA, followed by uncorrected Fisher's LSD test). **c**, Representative western blots for APP detection in cortex of App<sup>arc</sup>;WT and cKO mice, and relative quantification (mean $\pm$ SEM, n=4 mice per genotype). **d**, Quantification of plaque size in the cortex of App<sup>arc</sup>;WT and KO mice (WT n=158, cKO n=73 plaques) **e**, Representative max-projections of confocal stacks, acquired from cortex of WT;APP<sup>arc</sup> or cKO;APP<sup>arc</sup> adult mice, stained for amyloid plaques (ThioS) and immunostained for microglia markers (Iba1, CD45). Scale bar, 50 $\mu$ m. **f**, Positive correlation between plaque size/ThioS and Iba1 or **g**, plaque size/ThioS and CD45 staining is not different between genotypes, as shown by linear regression analysis. Mean $\pm$ SEM, WT n=18, cKO n=10 plaques; 4 animals per genotype.

**Figure S6, related to Figure 4. Engulfment of synaptic markers by microglia**

Representative 3D reconstruction of a single microglia cell acquired by confocal microscopy from the somatosensory cortex of a Cx3cr1<sup>CreER</sup>;Tardbp<sup>+/+</sup> mouse. The reconstruction shows vGlut1 immunoreactive puncta localized within CD68-positive phagocytic structure, inside an Iba1-positive microglia.

**Supplementary Table 1**, related to Figure 5a,b

Detailed information related to the ALS cohort selected for the clinical study.

|                               | ALS (65-74 yrs)   |                       |         | ALS (≥75 yrs)     |                       |         |
|-------------------------------|-------------------|-----------------------|---------|-------------------|-----------------------|---------|
|                               | with AD<br>(n=25) | without AD<br>(n=505) | p value | with AD<br>(n=12) | without AD<br>(n=156) | p value |
| Gender                        |                   |                       |         |                   |                       |         |
| % male                        | 48                | 59.8                  | 0.167   | 83.3              | 48.7                  | 0.02*   |
| Race                          |                   |                       |         |                   |                       |         |
| % Caucasian                   | 88                | 91.7                  | 0.496   | 91.7              | 94.9                  | 0.677   |
| ApoE genotype                 | 45.5              | 28                    | 0.132   | 16.7              | 22.4                  | 0.232   |
| % ApoE4<br>(3/4, 4/4)         |                   |                       |         |                   |                       |         |
| Type of symptom onset         |                   |                       |         |                   |                       |         |
| % Bulbar                      | 56                | 33.7                  | 0.067#  | 50                | 41.9                  | 0.4     |
| Survival in years<br>mean±SD  | 1.97±0.801        | 2.91±1.635            | 0.134   | 3.04±2.52         | 2.59±1.94             | 0.57    |
| MMSE<br>mean±SD               | 26.5±0.58         | 27.38±2.86            | 0.542   | 22.5±0.71         | 26.15±2.29            | 0.135   |
| Years of education<br>mean±SD | 15.8±1.56         | 14.16±0.19            | 0.22    | 14±2.00           | 13.26±0.48            | 0.70    |

**Supplementary Table 1**

**Supplementary Table 2**, related to Figure 5e-g

Detailed information related to the human post-mortem samples used for CD68, and pTDP-43-Iba1 colocalization study.

| Edinburgh Brain Bank Identifier | MRC Unique Identifier | Diagnosis       | Age | Sex |
|---------------------------------|-----------------------|-----------------|-----|-----|
| SD001-16                        | BBN001.28406          | Healthy Control | 79  | M   |
| SD017-16                        | BBN001.28793          | Healthy Control | 79  | F   |
| SD018-16                        | BBN001.28794          | Healthy Control | 79  | F   |
| SD024-15                        | BBN001.26495          | Healthy Control | 78  | M   |
| SD051-15                        | BBN001.28402          | Healthy Control | 79  | M   |
| SD063-13                        | BBN_19686             | Healthy Control | 77  | F   |
| SD002-16                        | BBN001.28407          | ALS             | 67  | F   |
| SD004-16                        | BBN001.28409          | ALS             | 62  | F   |
| SD010-14                        | BBN_20604             | ALS             | 62  | F   |
| SD014-14                        | BBN_20613             | ALS             | 50  | M   |
| SD016-14                        | BBN_20993             | ALS             | 43  | M   |
| SD018-15                        | BBN_25742             | ALS             | 58  | M   |
| SD021-15                        | BBN_26494             | ALS             | 60  | M   |
| SD026-15                        | BBN001.26125          | ALS             | 49  | F   |
| SD027-14                        | BBN_22225             | ALS             | 62  | M   |
| SD027-15                        | BBN001.26126          | ALS             | 71  | M   |
| SD029-15                        | BBN001.26098          | ALS             | 59  | F   |
| SD030-15                        | BBN001.26128          | ALS             | 74  | M   |
| SD033-15                        | BBN001.26497          | ALS             | 63  | F   |
| SD036-15                        | BBN001.26498          | ALS             | 78  | M   |
| SD041-14                        | BBN_24218             | ALS             | 68  | M   |
| SD045-15                        | BBN001.26729          | ALS             | 83  | F   |
| SD046-15                        | BBN001.26730          | ALS             | 54  | M   |
| SD047-13                        | BBN_18803             | ALS             | 75  | F   |
| SD048-14                        | BBN_24321             | ALS             | 63  | F   |
| SD049-13                        | BBN_18806             | ALS             | 60  | M   |
| SD049-15                        | BBN001.26765          | ALS             | 66  | F   |
| SD052-13                        | BBN_18807             | ALS             | 65  | F   |
| SD053-13                        | BBN_19689             | ALS             | 89  | M   |
| SD057-13                        | BBN_19688             | ALS             | 57  | M   |
| SD058-13                        | BBN_20616             | ALS             | 40  | F   |
| SD059-13                        | BBN_20617             | ALS             | 71  | M   |
| SD059-14                        | BBN_24669             | ALS             | 64  | M   |
